# Supplementary material
Source: PubMed Central journal article supplement (PMC5798327)
Supplement: pnas.201711293SI.pdf [file pnas.201711293SI.pdf]

# Supporting Information

Huo et al. 10.1073/pnas.1711293115

## SI Methods

Below is the verbatim information received by participants for the welcoming condition (with the information associated with the unwelcoming condition in bold):

Some lawmakers in [Arizona/New Mexico] want the state to adopt policies that would make the state [more/less] welcoming for immigrants. Some policies that have been suggested include:

[adding/reducing] more social services for noncitizens

[providing more government documents in languages other than English/requiring that government documents be available only in English]

[allowing all residents to get identification cards/requiring employers to verify the immigration status of their employees]

In general would you support or oppose these kinds of efforts to make [Arizona/New Mexico] [more/less] welcoming for immigrants?

**Table S1. Descriptive statistics for positive feelings in response to proposed local immigration policy by ideology, ethn racial-nativity, and state**

| State/ideology | Foreign-born Latinos |             | US-born Latinos |             | US-born whites |             |
|----------------|----------------------|-------------|-----------------|-------------|----------------|-------------|
|                | Hostile              | Welcoming   | Hostile         | Welcoming   | Hostile        | Welcoming   |
|                | M (SD)               | M (SD)      | M (SD)          | M (SD)      | M (SD)         | M (SD)      |
| Arizona        |                      |             |                 |             |                |             |
| Liberal        | 2.37 (0.86)          | 3.50 (0.61) | 1.73 (0.63)     | 3.41 (0.76) | 1.96 (0.90)    | 3.62 (0.55) |
| Moderate       | 2.23 (0.79)          | 3.38 (0.72) | 2.21 (0.87)     | 3.20 (0.72) | 2.58 (0.95)    | 3.14 (0.88) |
| Conservative   | 2.05 (0.97)          | 3.41 (0.66) | 2.39 (0.91)     | 2.96 (0.95) | 2.89 (0.83)    | 2.53 (0.96) |
| New Mexico     |                      |             |                 |             |                |             |
| Liberal        | 1.73 (0.80)          | 3.45 (0.56) | 2.30 (0.88)     | 3.23 (0.86) | 1.96 (0.85)    | 3.49 (0.68) |
| Moderate       | 1.74 (0.81)          | 3.62 (0.52) | 2.35 (0.97)     | 3.12 (0.74) | 2.63 (0.89)    | 2.88 (0.87) |
| Conservative   | 2.21 (0.99)          | 3.23 (0.74) | 2.71 (0.87)     | 2.83 (0.80) | 3.06 (0.70)    | 2.40 (0.94) |

**Table S2. Descriptive statistics for belonging in response to proposed local immigration policy by ideology, ethn racial-nativity, and state**

| State/ideology | Foreign-born Latinos |             | US-born Latinos |             | US-born whites |             |
|----------------|----------------------|-------------|-----------------|-------------|----------------|-------------|
|                | Hostile              | Welcoming   | Hostile         | Welcoming   | Hostile        | Welcoming   |
|                | M (SD)               | M (SD)      | M (SD)          | M (SD)      | M (SD)         | M (SD)      |
| Arizona        |                      |             |                 |             |                |             |
| Liberal        | 2.59 (1.30)          | 4.12 (0.74) | 2.02 (1.08)     | 3.92 (0.80) | 2.14 (1.12)    | 3.87 (1.11) |
| Moderate       | 2.48 (1.03)          | 4.28 (0.72) | 2.77 (1.25)     | 3.63 (1.21) | 2.88 (1.22)    | 3.45 (1.12) |
| Conservative   | 2.66 (1.09)          | 4.24 (0.74) | 3.03 (1.04)     | 3.18 (1.15) | 3.53 (1.03)    | 2.80 (1.12) |
| New Mexico     |                      |             |                 |             |                |             |
| Liberal        | 2.47 (1.23)          | 4.38 (0.64) | 2.84 (1.29)     | 3.78 (1.01) | 2.21 (0.95)    | 3.58 (1.13) |
| Moderate       | 2.03 (1.07)          | 4.04 (1.46) | 2.98 (1.15)     | 3.52 (1.06) | 3.19 (0.96)    | 2.95 (1.22) |
| Conservative   | 2.91 (1.45)          | 3.88 (1.27) | 3.05 (1.37)     | 3.08 (1.25) | 3.64 (0.94)    | 2.28 (1.07) |
